# Supplementary material for: Towards low-temperature preparation of air-stable hybrid light-emitting diodes
Source: Royal Society of Chemistry journal article supplement (doi:10.1039/c0jm03636f), 2011-01-01
Supplement: c0jm03636f.pdf [file c0jm03636f.pdf]

## **Towards low-temperature preparation of air-stable hybrid light-emitting diodes**

James William Ryan,<sup>a</sup> Emilio Palomares<sup>a,b</sup> and Eugenia Martínez-Ferrero<sup>a\*</sup>

<sup>a</sup> Institute of Chemical Research of Catalonia (ICIQ), Avda. Països Catalans 16,

Tarragona, Spain. Fax: +34 977 920 224; Tel: +34 977 920 200; E-mail:

emartinez@iciq.es

<sup>b</sup> Institute of Research and Advanced Studies of Catalonia (ICREA), Avda. Lluís

Companys 23, Barcelona, Spain

SUPPLEMENTARY INFORMATION

Device characterization:

Current density and luminance versus applied voltage were recorded using a Keithley 2400 combined with a Konica Minolta LS100 luminance meter. The instruments were controlled and the data captured using in-house software. XRD measurements were made using a Bruker-AXS D8-Discover diffractometer equipped with parallel incident beam (Göbel mirror), vertical  $\theta$ - $\theta$  goniometer, XYZ motorized stage and with a GADDS (General Area Diffraction System).

ZnO film characterization:

Roughness Mean Square (RMS) values were measured by Atomic Force Microscopy (AFM), performed on tapping mode on a Molecular Imaging model Pico SPM II (Pico +). X-ray diffraction was done on ZnO films deposited onto Si (001) substrates at different temperatures using a Bruker-AXS D8-Discover diffractometer equipped with parallel incident beam (Göbel mirror), vertical  $\theta$ - $\theta$  goniometer, XYZ motorized stage and with a GADDS (General Area Diffraction System). The X-ray diffractometer was operated at 40 kV and 40 mA to generate  $\text{CuK}\alpha$  radiation. The GADDS detector was 30x30 cm with a 1024x1024 pixel sensor. We collected one frame (2D XRD pattern) covering 20-50°  $2\theta$  in grazing incidence mode ( $\omega$ : 1°,  $2\theta$ : 34°) at a distance of 15cm from the sample to the detector. The exposition time was 300s per frame and it was chi-integrated to generate the conventional  $2\theta$  vs. intensity diffractogram.

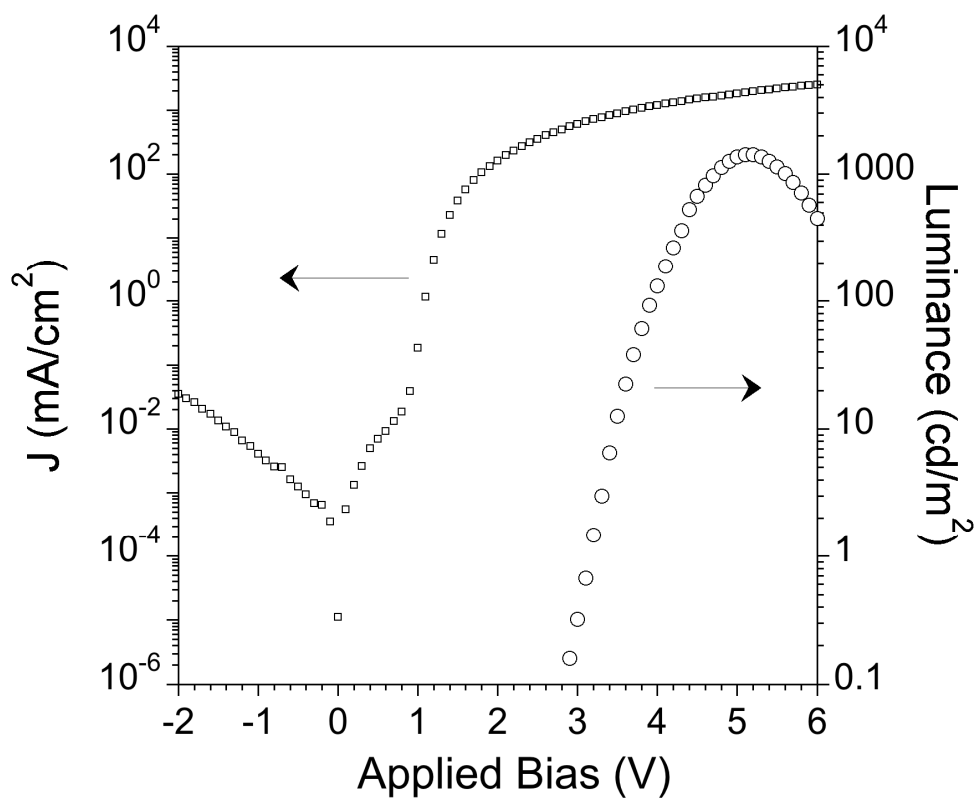

**Figure S1.** Device performance of ITO/F8BT/MoO<sub>3</sub>/Au.

**Table S1** Crystallite size derived from X-ray diffraction measurements.

| Substrate temperature (°C) | Orientation | Crystallite size (nm) |
|----------------------------|-------------|-----------------------|
| 450                        | (100)       | -                     |
| 450                        | (002)       | 6.4                   |
| 450                        | (101)       | 11.5                  |
| 450                        | (102)       | 5.5                   |
| 350                        | (100)       | 5.6                   |
| 350                        | (002)       | 6.0                   |
| 350                        | (101)       | 7.3                   |
| 350                        | (102)       | 3.9                   |
| 250                        | (100)       | 5.2                   |
| 250                        | (002)       | 4.8                   |
| 250                        | (101)       | 4.8                   |
| 250                        | (102)       | -                     |
